# Supplementary material for: Combined Immune Defect in B-Cell Lymphoproliferative Disorders Is Associated with Severe Infection and Cancer Progression
Source: MDPI journal article supplement (doi:10.3390/biomedicines10082020), 2022-08-19
Supplement: s1 [file s1]

## Supplementary material

**Supplementary Table S1.** B-cell lymphoproliferative disorders studied groups according to hematological disease.

| Hematological disease        | No. of patients |
|------------------------------|-----------------|
| NHL                          | 41              |
| CLL                          | 18              |
| MGUS                         | 12              |
| MM                           | 6               |
| HL                           | 3               |
| Waldeström disease           | 2               |
| Acute lymphoblastic leukemia | 1               |

**Abbreviations:** non-Hodgkin lymphoma (NHL), chronic lymphocytic leukemia (CLL), monoclonal gammopathy of undetermined significance (MGUS), multiple myeloma (MM), Hodgkin lymphoma (HL), Waldeström disease (WD) and lymphoblastic acute leukemia (LAL).

**Supplementary. Table S2.** Defective specific antibody response of the main cohort groups.

|      | <b>Anti-TT</b> | <b>Anti-PCP</b> | <b>Anti-S. typhi</b> |
|------|----------------|-----------------|----------------------|
| NHL  | 89%            | 97%             | 97%                  |
| CLL  | 100%           | 83%             | 100%                 |
| MGUS | 66%            | 92%             | 75%                  |

Anti-TT: tetanus-toxoid; PCP: pneumococcal, S. typhi: Salmonella typhi. Adapted from Ochoa-Grullón et al. Clinical Immunology 2020.
